# Supplementary material
Source: PubMed Central journal article supplement (PMC3635117)
Supplement: NIHMS454708-supplement-SM1.pdf [file NIHMS454708-supplement-SM1.pdf]

**ADVANCED  
HEALTHCARE  
MATERIALS**

Supporting Information

for *Adv. Healthcare Mater.*, DOI: 10.1002/adhm. 201200194

**Directed Differentiation of Size-Controlled Embryoid Bodies  
Towards Endothelial and Cardiac Lineages in RGD-Modified  
Poly(Ethylene Glycol) Hydrogels graphy**

*Lina Schukur, Pinar Zorlutuna, Jae Min Cha, Hojae Bae, and  
Ali Khademhosseini\**

## Supporting Information

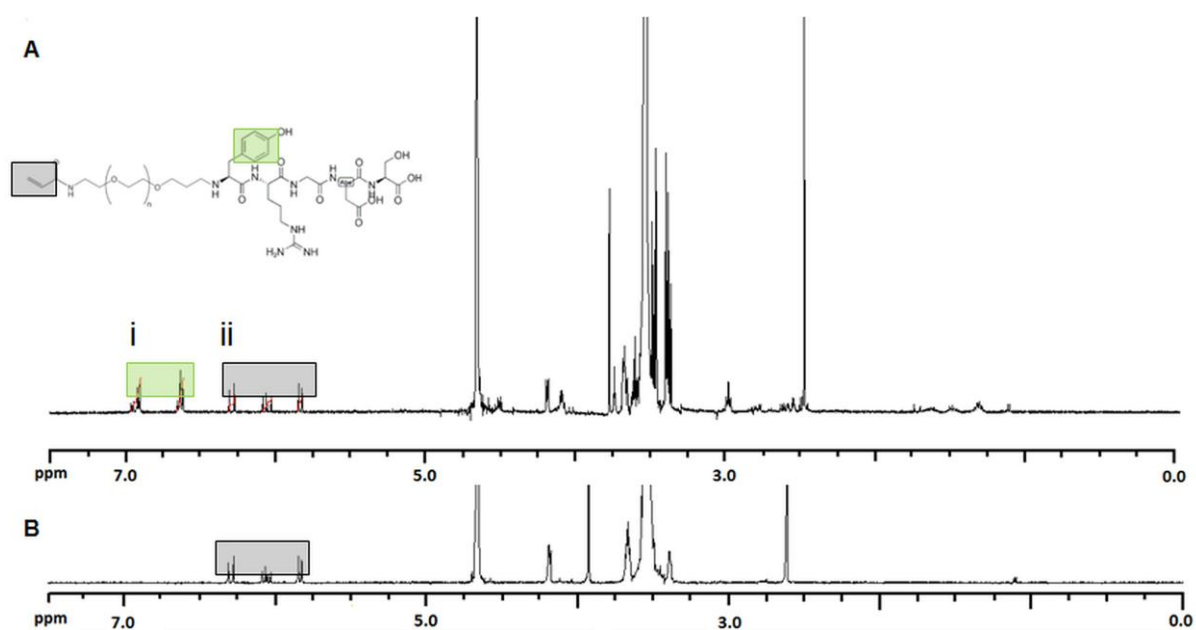

**Figure S1:** <sup>1</sup>H-NMR spectra of (A) Acryl-PEG-YRGDS and (B) Acryl-PEG-NHS. Peak (i) corresponds to the acryl group of PEG and (ii) corresponds to the aromatic group of YRGDS.

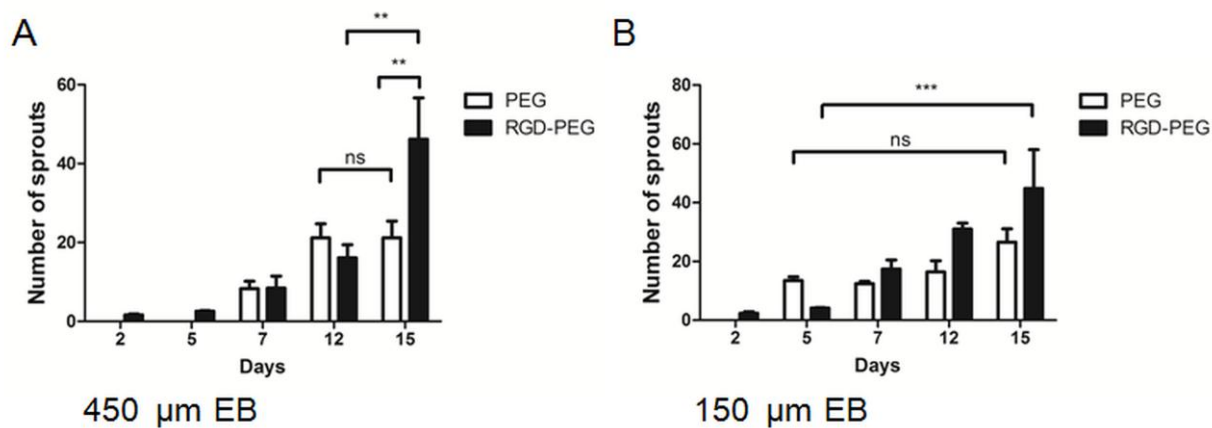

**Figure S2:** Number of endothelial sprouts. The number of sprouts, derived from one EB or originating of pre-existing vessel sprouts was counted over 15 days in 450 μm-EBs (A) and 150 μm-EBs (B). Data compare EBs inside PEG and RGD-PEG hydrogels. Mean values refer to one EB and were generated from 3 different samples. (n = 3, \* indicates  $P \leq 0.05$ ). Error bars without \* do not represent statistical significance.

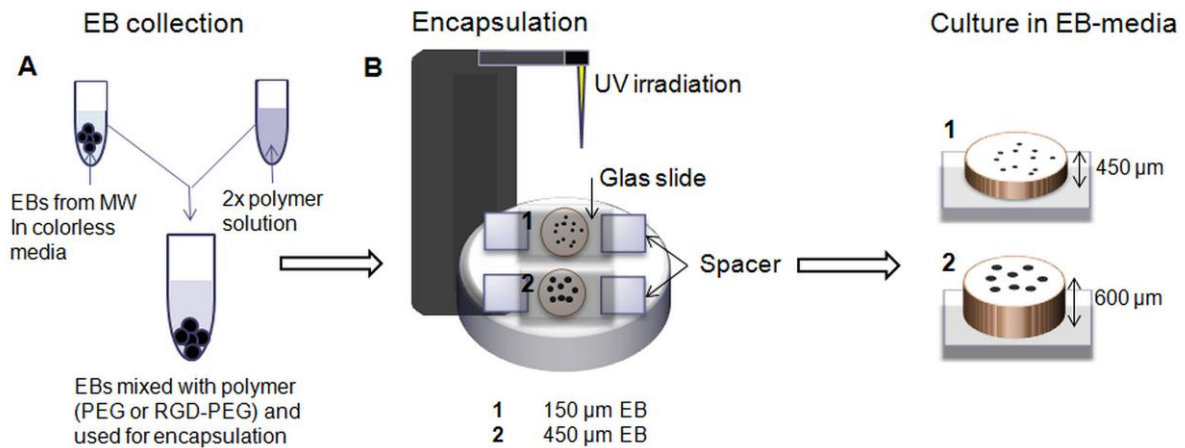

**Figure S3:** Encapsulation procedure. (A) Different sized EBs (150  $\mu\text{m}$  and 450  $\mu\text{m}$  in diameter) were collected from PEG-microwell arrays after 5 days of culture in EB media and (B) encapsulated in 4-arm PEG with or without RGD-conjugation. A double concentrated polymer solution (PEG or RGD-PEG polymer) was prepared and mixed in 1:1 ratio with colorless DMEM, which contained collected EBs. The polymerization reaction was performed under UV exposure. The use of spacers enabled the control over sample thickness. Encapsulated EBs were cultured in EB media for 15 days. The numbers 1 and 2 refer to the EB-size (1: 150  $\mu\text{m}$ -EBs; 2: 450  $\mu\text{m}$ -EBs). The height of the gel sample containing 150  $\mu\text{m}$ -EBs was 450  $\mu\text{m}$ , while the height of the gel sample containing 450  $\mu\text{m}$ -EBs was 600  $\mu\text{m}$ .
